# Supplementary material for: Synthesis, characterization and antimicrobial evaluation of ferrocene–oxime ether benzyl 1H-1,2,3-triazole hybrids
Source: Royal Society of Chemistry journal article supplement (doi:10.1039/c9nj00660e), 2019-01-01
Supplement: c9nj00660e1.pdf [file c9nj00660e1.pdf]

## Supporting Information

### **Synthesis, characterization and antimicrobial evaluation of ferrocene-oxime ether benzyl 1*H*-1,2,3-triazole hybrids**

Yagnam Swetha,<sup>a,b</sup> Eda Rami Reddy,<sup>a,f</sup> Jakku Ranjith Kumar,<sup>a</sup> Rajiv Trivedi\*<sup>a,b</sup>, Lingamallu Giribabu,<sup>b,c</sup> Balasubramanian Sridhar,<sup>d</sup> Balaji Rathod,<sup>e</sup> and Reddy Shetty Prakasham<sup>e</sup>

---

<sup>a</sup> *Catalysis and Fine Chemicals Division, CSIR-Indian Institute of Chemical Technology, Uppal Road, Tarnaka, Hyderabad 500007, India. E-mail: trivedi@iict.res.in, rtrajiv401@gmail.com*

<sup>b</sup> *Academy of Scientific and Innovative Research (AcSIR), CSIR-IICT Campus, Hyderabad 500007, India*

<sup>c</sup> *Polymer and Functional Materials Division, CSIR-Indian Institute of Chemical Technology, Uppal Road, Tarnaka, Hyderabad 500007, India.*

<sup>d</sup> *Centre for X-ray Crystallography, CSIR-Indian Institute of Chemical Technology, Hyderabad 500007, India.*

<sup>e</sup> *Organic Synthesis and Process Chemistry Division, CSIR-Indian Institute of Chemical Technology, Hyderabad 500007, India*

<sup>f</sup> *Department of Chemistry, Indian Institute of Technology, Indore 453552, India.*

## Contents

1.  $^1\text{H}$ ,  $^{13}\text{C}$  and HRMS spectra of **3** and **5a-h** **3-16**
2. Stability studies **17-18**
3. Crystallographic data of compound **5a** **19-29**

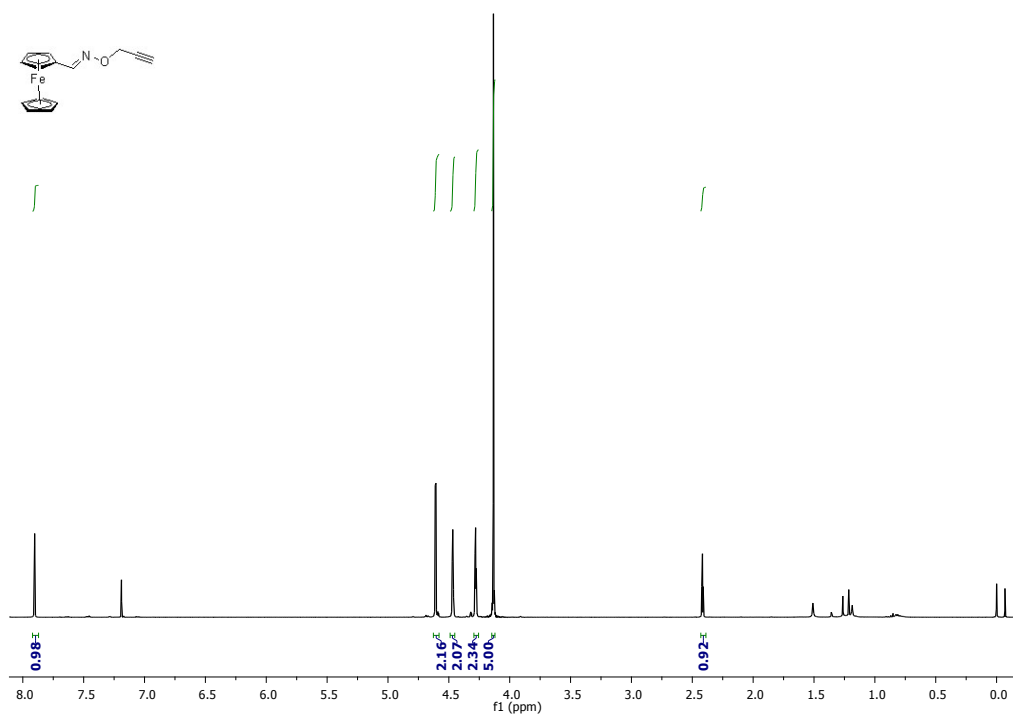Figure S1:  $^1\text{H}$  NMR spectra of 3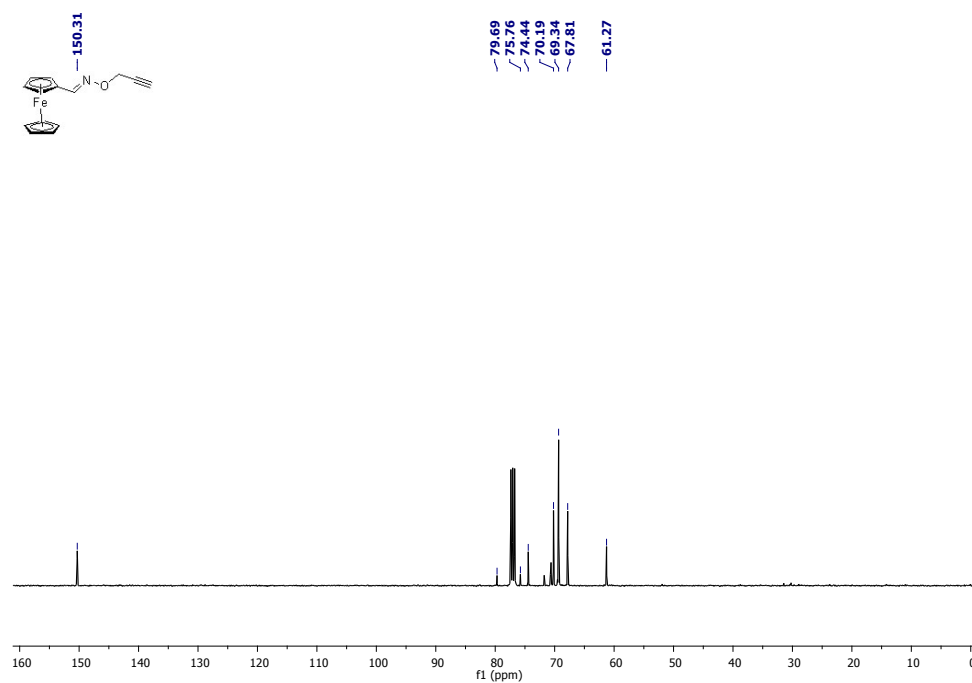Figure S2:  $^{13}\text{C}$  NMR spectra of 3

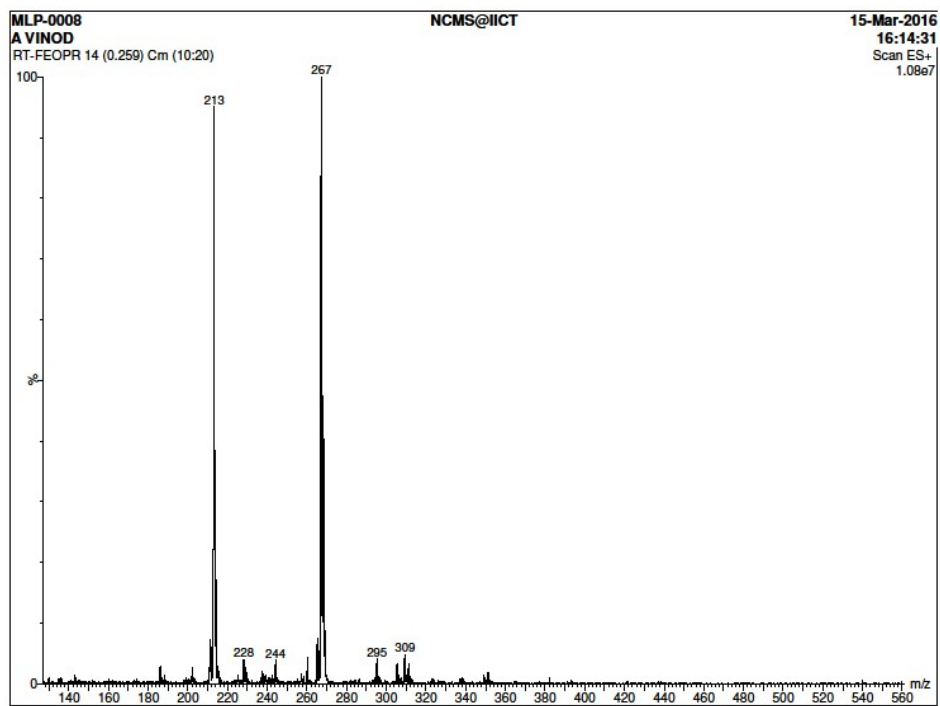

Figure S3: ESI-MS spectra of 3

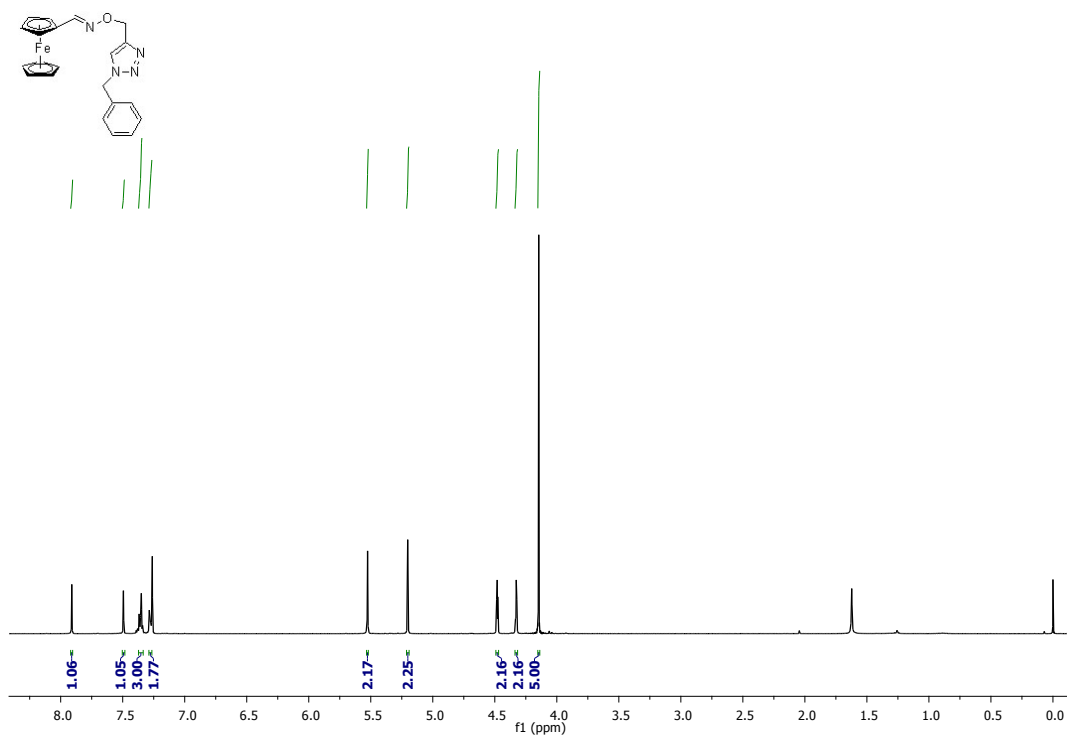Figure S4:  $^1\text{H}$  NMR spectra of 5a

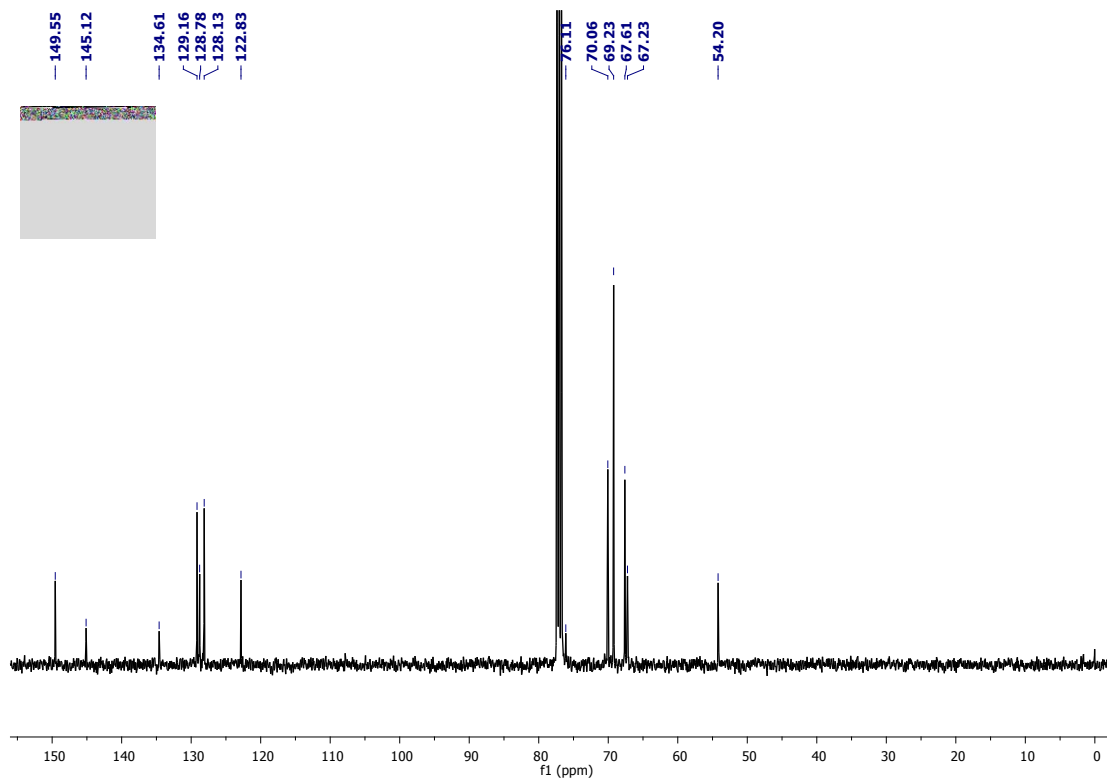Figure S5: <sup>13</sup>C NMR spectra of 5a

D:\Sai krishna Importantf...RT-SIMOX  
RAJITHA

CSIR-INDIAN INSTITUTE OF CHEMICAL TECHNOLOGY  
NATIONAL CENTRE FOR MASS SPECTROMETRY

Analysed By G SaiKrishna  
11/8/2017 7:10:14 PM  
Thermo Exactive Orbitrap

RT-SIMOX #17-65 RT: 0.06-0.22 AV: 49 NL: 4.96E7  
T: FTMS [1,1] + p ESI Full ms [103.00-2000.00]

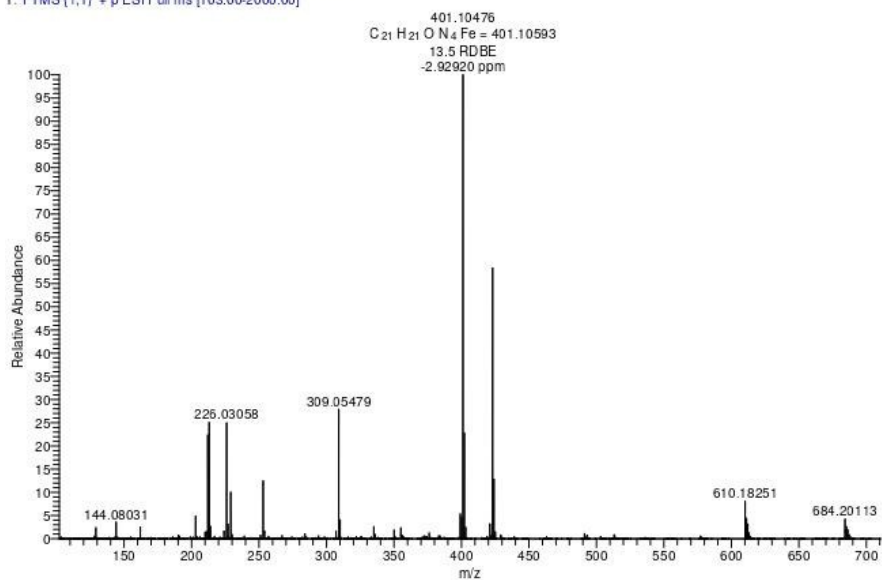

Figure S6: HRMS spectra of 5a

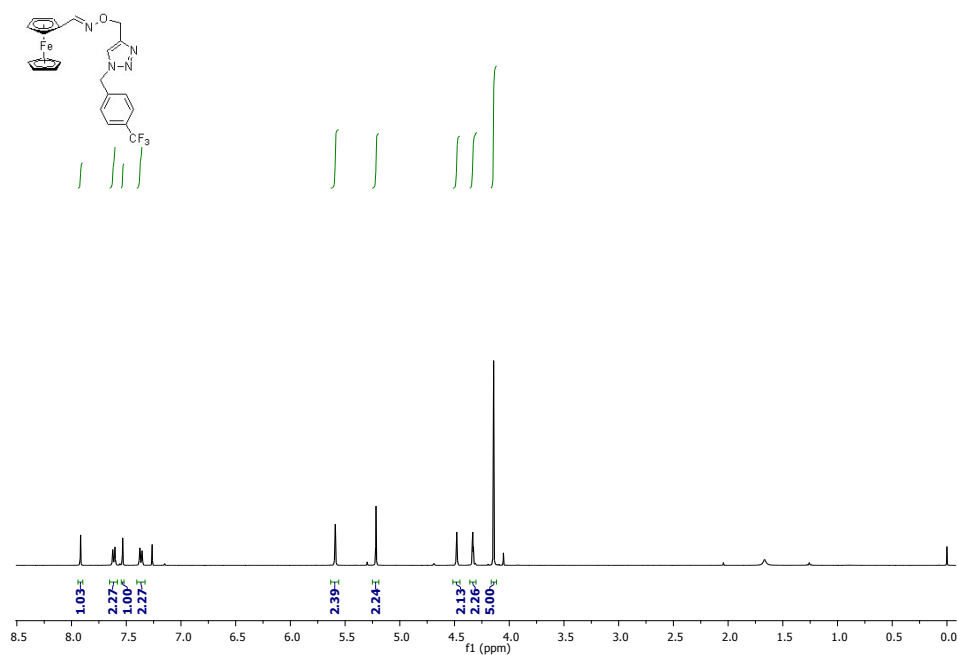Figure S7: <sup>1</sup>H NMR spectra of 5b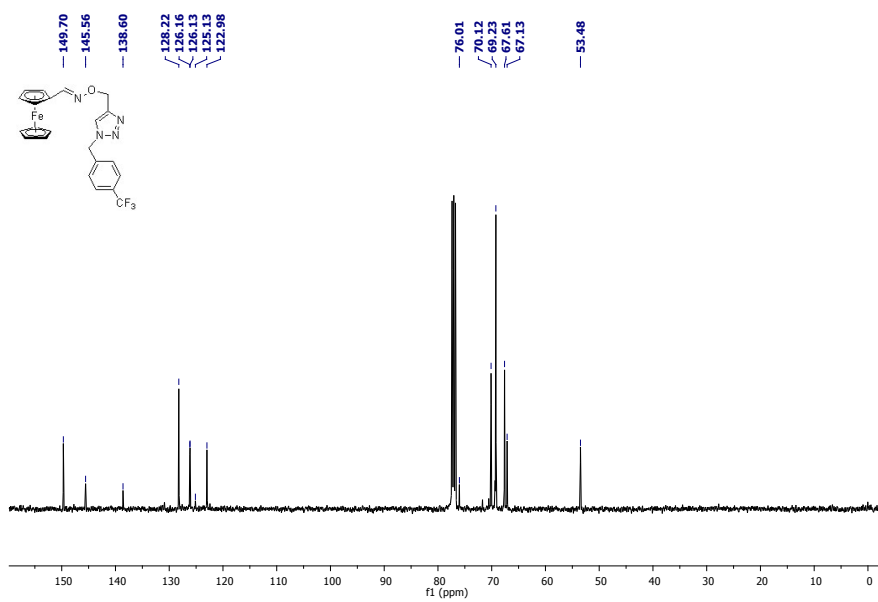Figure S8: <sup>13</sup>C NMR spectra of 5b

D:\Sai krishna Important...RT-4CF3OX  
RANJITHA

CSIR-INDIAN INSTITUTE OF CHEMICAL TECHNOLOGY  
NATIONAL CENTRE FOR MASS SPECTROMETRY

Analysed By G. SaiKrishna  
11/7/2017 1:47:37 AM  
Thermo Exactive Orbitrap  
RT-4CF3OX #9-47 RT: 0.06-0.19 AV: 39 NL: 4.66E7  
T: FTMS [1,1] + p ESI Full ms [103.00-2000.00]

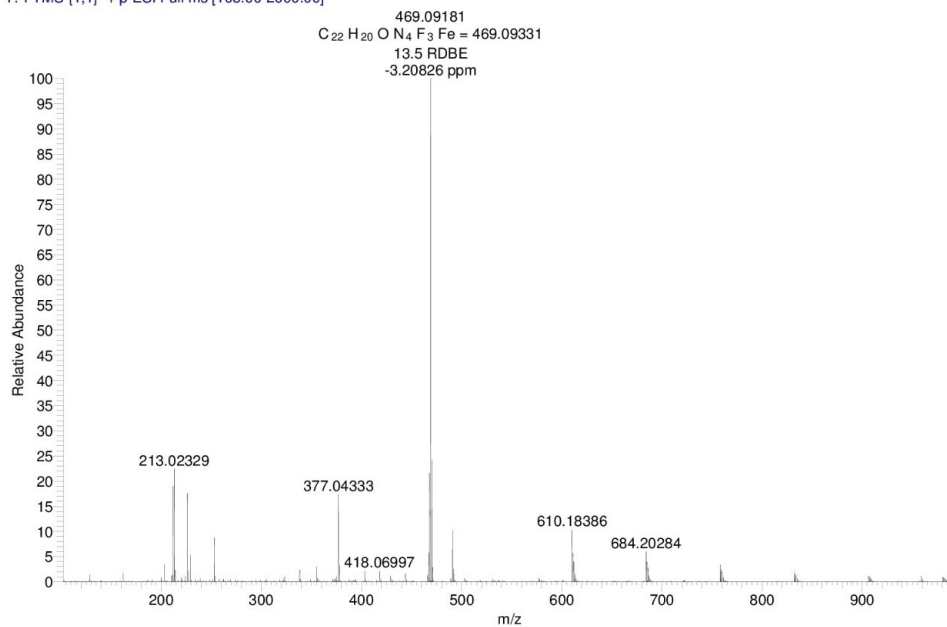

Figure S9: HRMS spectra of 5b

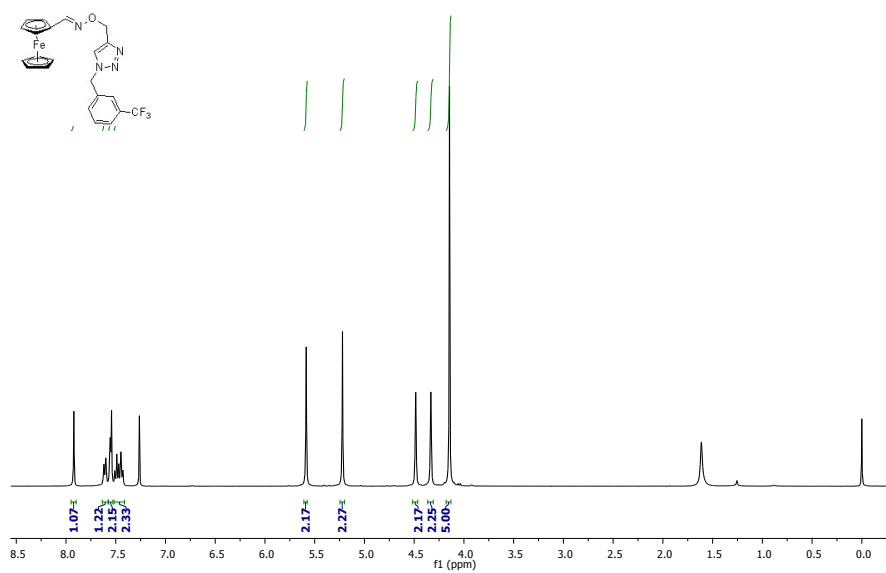

Figure S10: <sup>1</sup>H NMR spectra of 5c

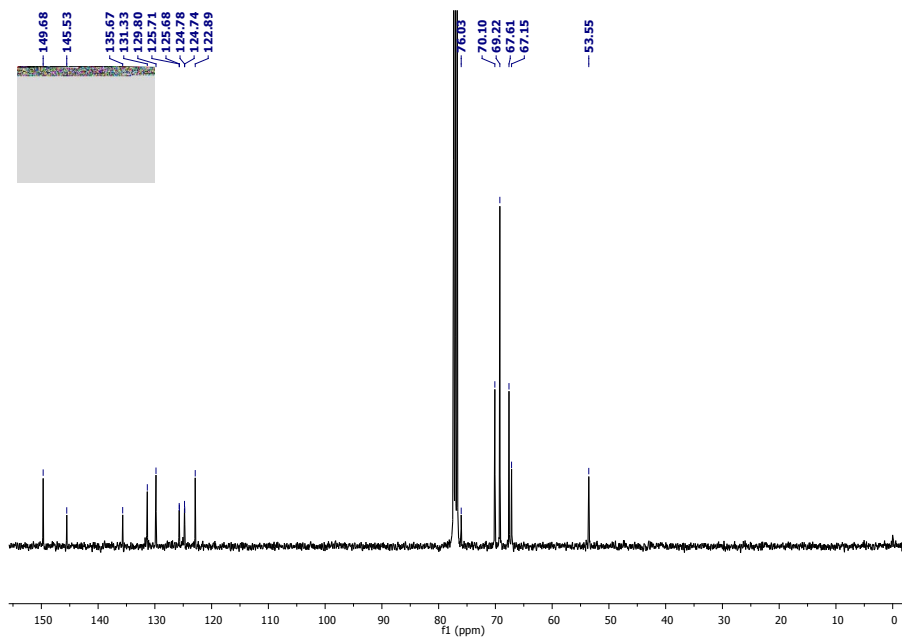

Figure S11:  $^{13}\text{C}$  NMR spectra of 5c

D:\Sai krishna Important\...RT-3CF3OX  
RAJITHA

CSIR-INDIAN INSTITUTE OF CHEMICAL TECHNOLOGY  
NATIONAL CENTRE FOR MASS SPECTROMETRY

Analysed By G SaiKrishna  
11/6/2017 7:15:32 PM  
Thermo Exactive Orbitrap

RT-3CF3OX #18-53 RT: 0.08-0.19 AV: 36 NL: 4.61E7  
T: FTMS [1,1] + p ESI Full ms [103.00-2000.00]

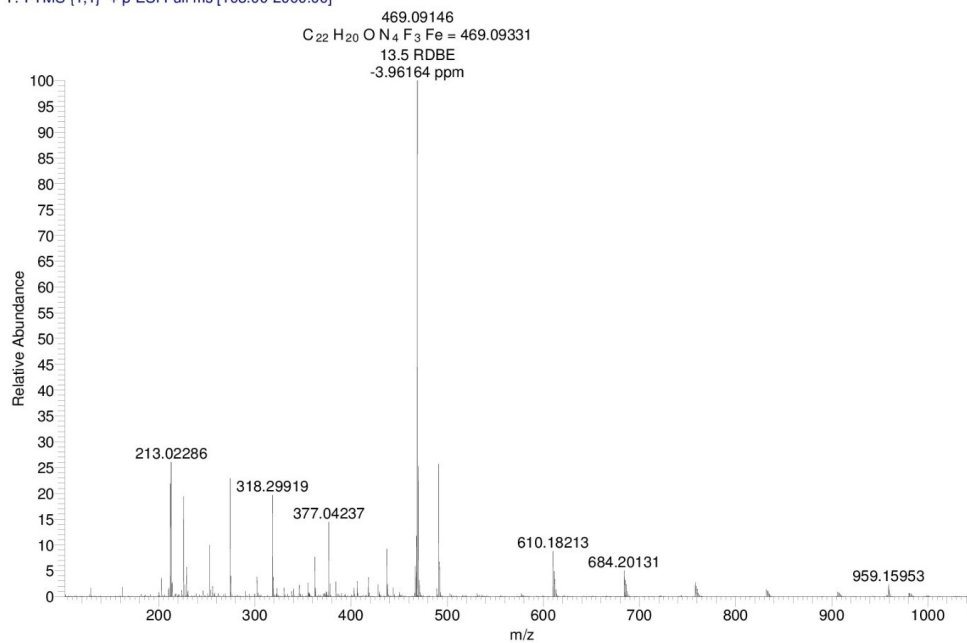

Figure S12: HRMS spectra of 5c



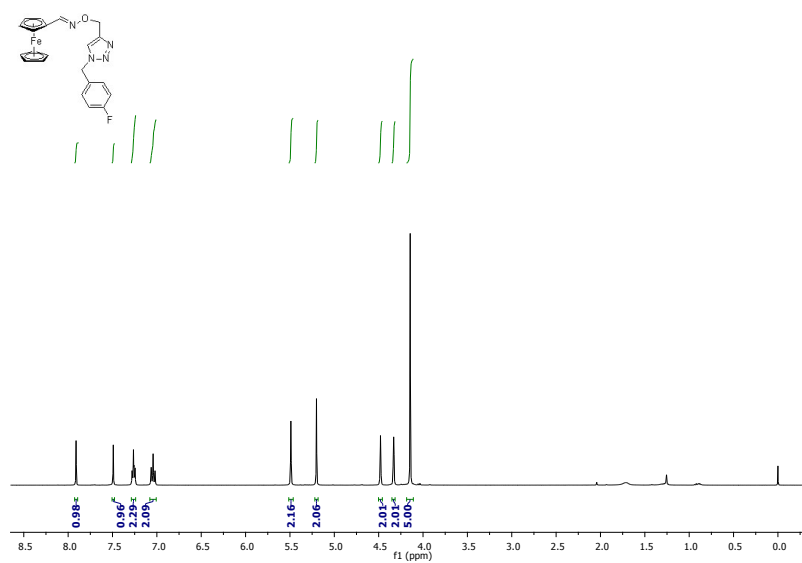Figure S13: <sup>1</sup>H NMR spectra of 5d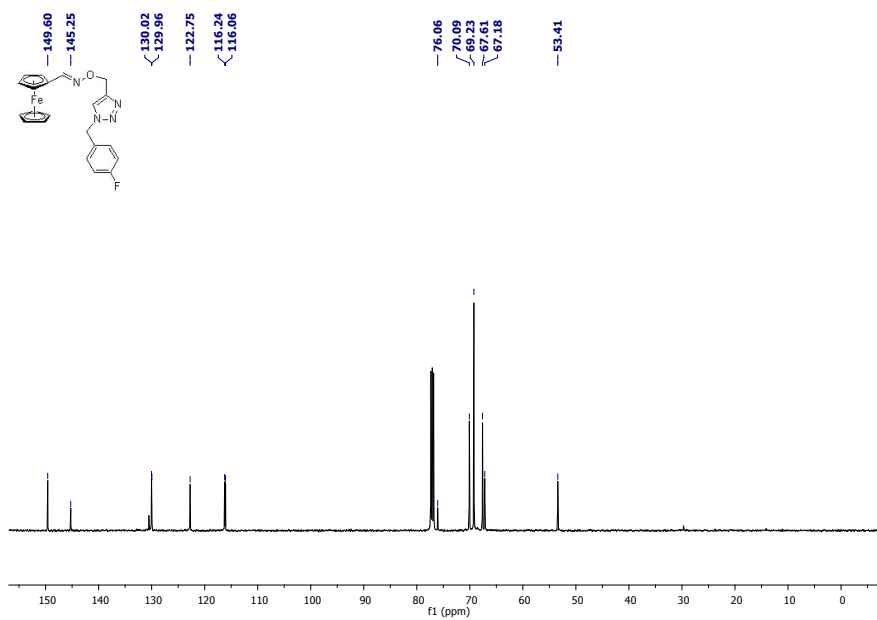Figure S14: <sup>13</sup>C NMR spectra of 5d

D:\Sai krishna Important...RT-4-F-OX  
RAJITHA

CSIR-INDIAN INSTITUTE OF CHEMICAL TECHNOLOGY  
NATIONAL CENTRE FOR MASS SPECTROMETRY

Analysed By G SaiKrishna  
11/6/2017 7:07:35 PM  
Thermo Exactive Orbitrap

RT: 4-F-OX #27-57 RT: 0.11-0.21 AV: 31 NL: 5.95E7  
T: FTMS {1,1} + p ESI Full ms [103.00-2000.00]

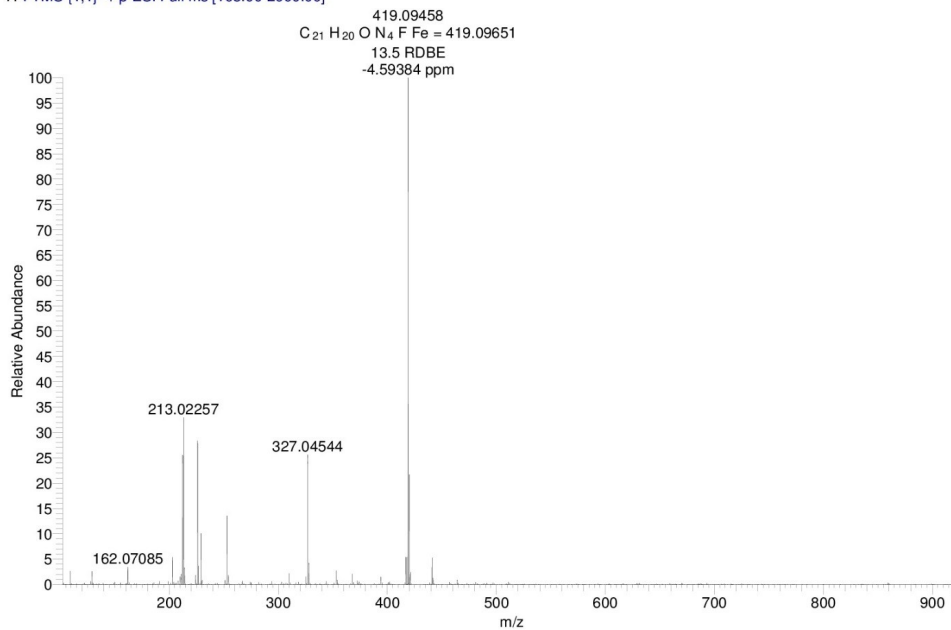

Figure S15: HRMS spectra of 5d

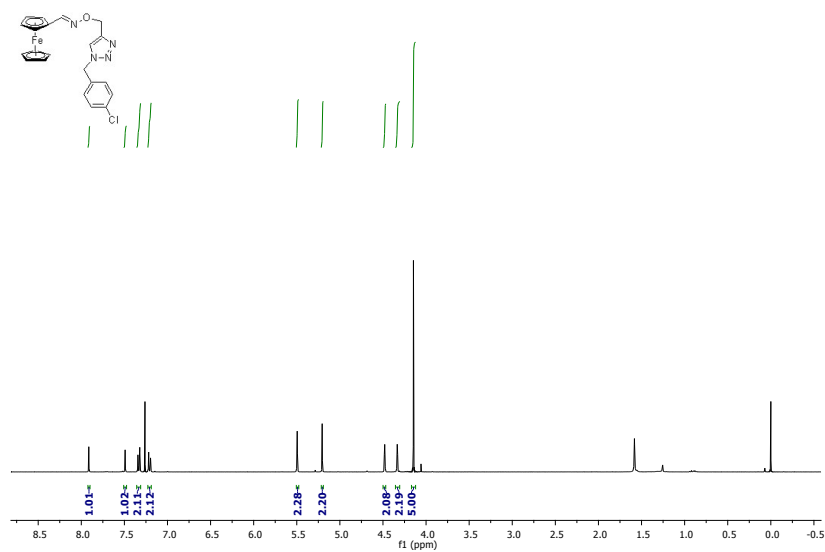

Figure S16: <sup>1</sup>H NMR spectra of 5e

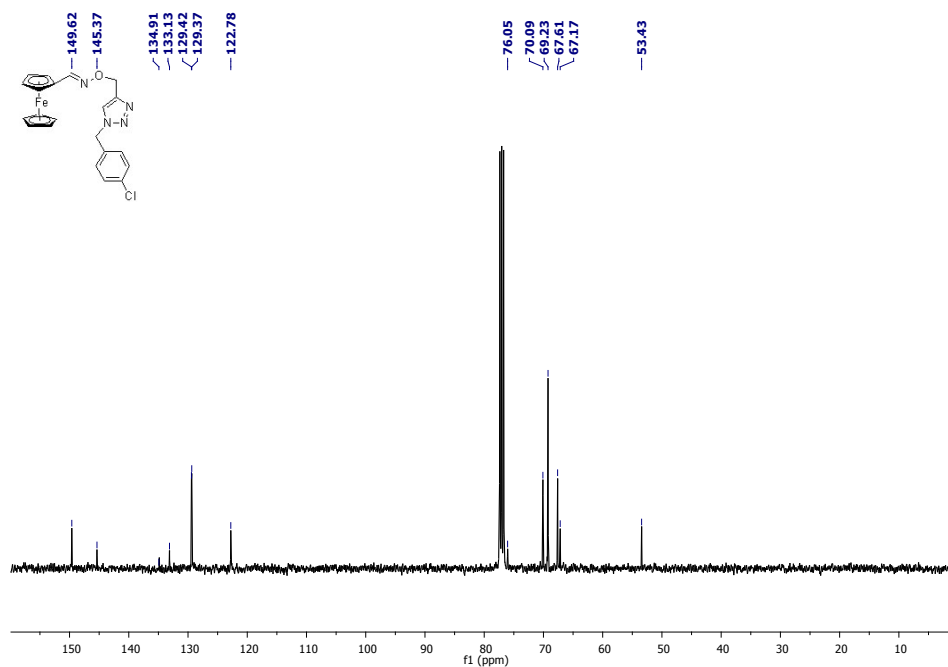Figure S17:  $^{13}\text{C}$  NMR spectra of 5e

D:\Sai krishna Important...RT-4-CLOX  
RAJITHA

CSIR-INDIAN INSTITUTE OF CHEMICAL TECHNOLOGY  
NATIONAL CENTRE FOR MASS SPECTROMETRY

Analysed By G SaiKrishna  
11/6/2017 7:04:56 PM  
Thermo Exactive Orbitrap  
RT-4-CLOX #10-60 RT: 0.06-0.23 AV: 51 NL: 2.65E7  
T: FTMS [1,1] +p ESI Full ms [103.00-2000.00]

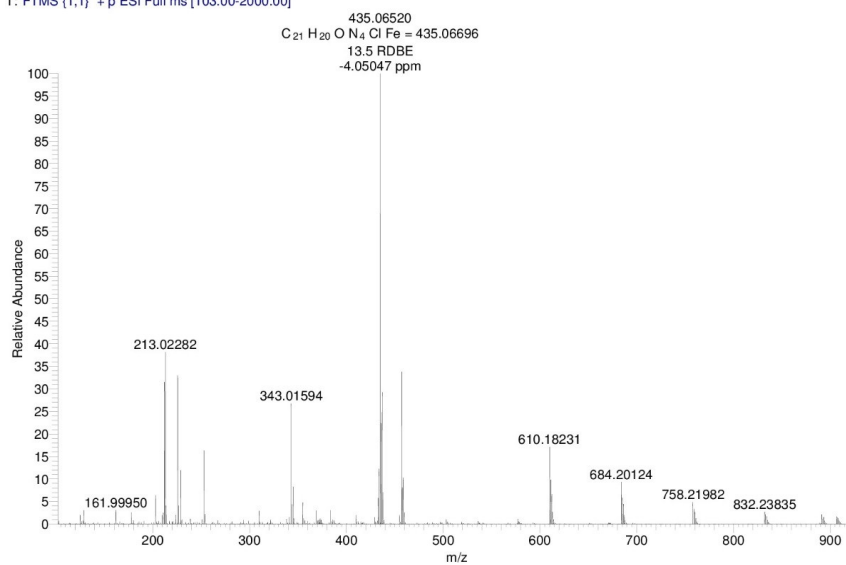

Figure S18: HRMS spectra of 5e

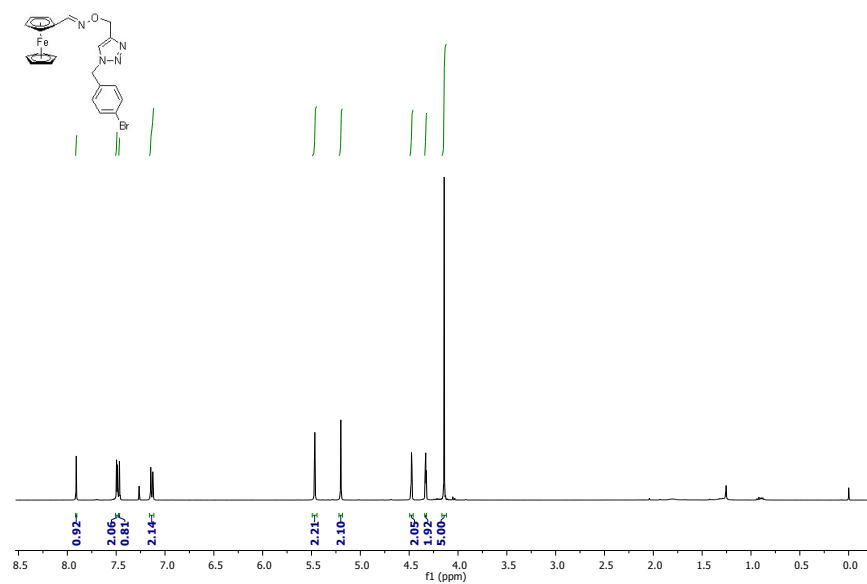Figure S19: <sup>1</sup>H NMR spectra of 5f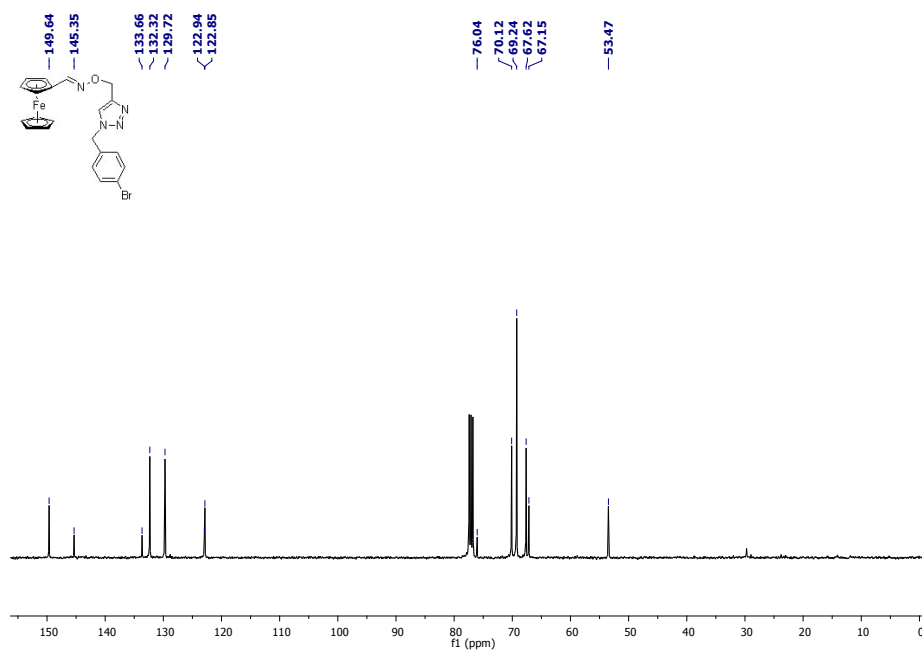Figure S20: <sup>13</sup>C NMR spectra of 5f

D:\Sai krishna Important...RT-4-BR-OX  
RAJITHA

CSIR-INDIAN INSTITUTE OF CHEMICAL TECHNOLOGY  
NATIONAL CENTRE FOR MASS SPECTROMETRY

Analysed By G SaiKrishna  
11/6/2017 7:12:51 PM  
Thermo Exactive Orbitrap

RT-4-BR-OX #15-62 RT: 0.06-0.22 AV: 48 NL: 1.60E7  
T: FTMS (1,1) + p ESI Full ms [103.00-2000.00]

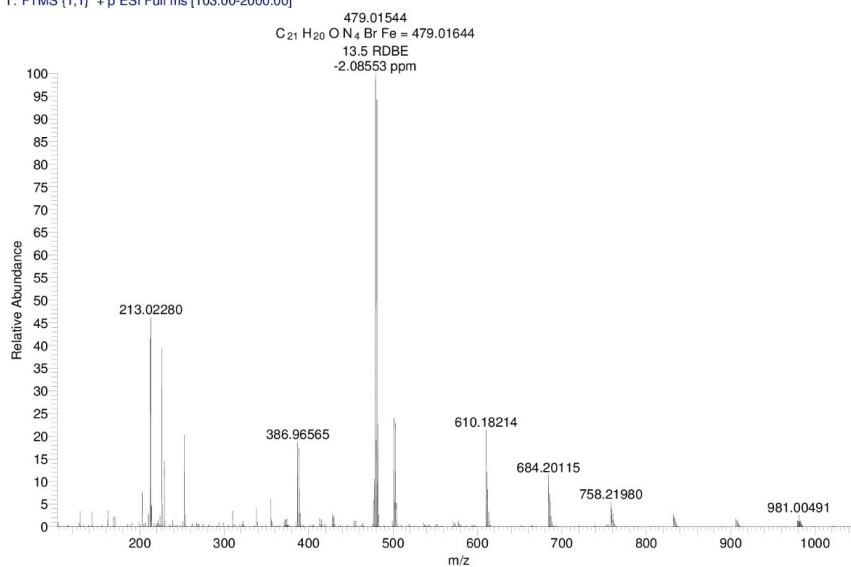

Figure S21: HRMS spectra of 5f

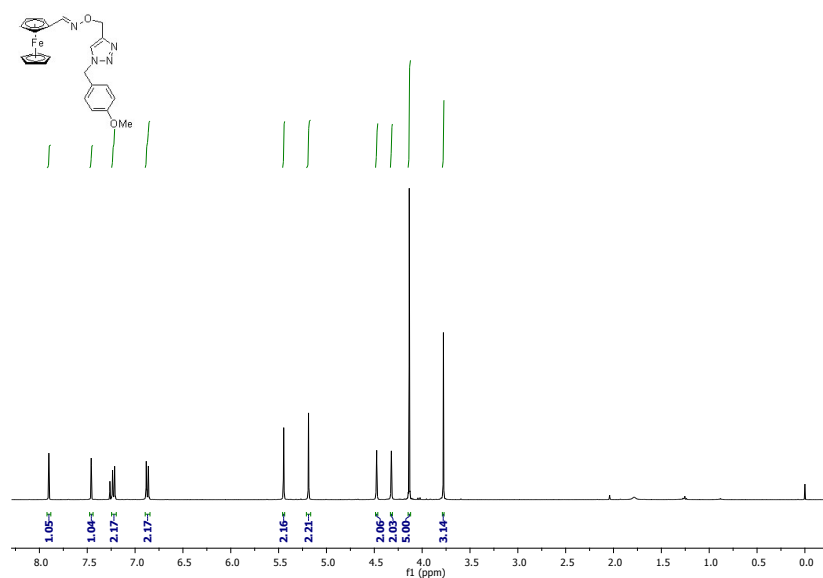

Figure S22: <sup>1</sup>H NMR spectra of 5g

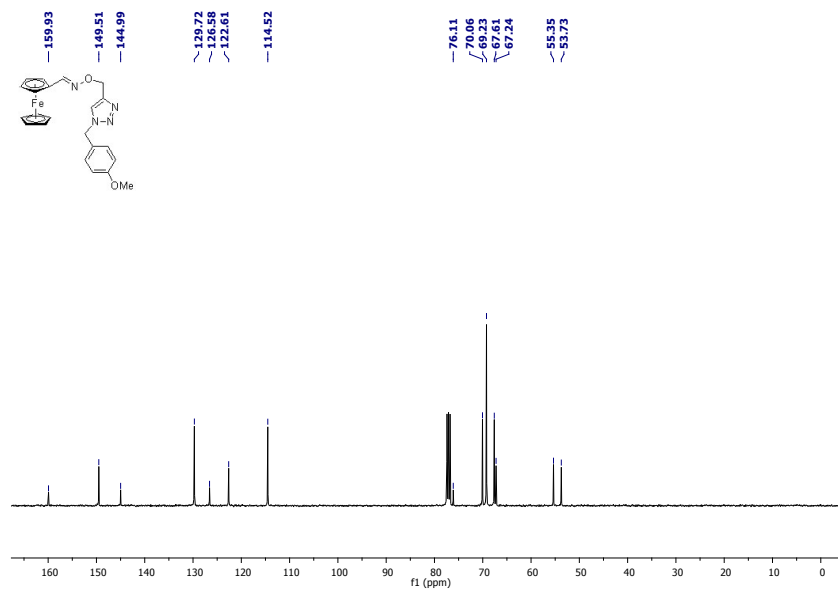

Figure S23: <sup>13</sup>C NMR spectra of 5g

D:\Sai krishna Important...IRT-4OMEOX  
 RANJITHA  
 RAJIV TRIVEDI

CSIR-INDIAN INSTITUTE OF CHEMICAL TECHNOLOGY  
 NATIONAL CENTRE FOR MASS SPECTROMETRY

Analysed By G SaiKrishna  
 11/7/2017 12:06:54 PM  
 Thermo Exactive Orbitrap

RT-4OMEOX #10-71 RT: 0.04-0.25 AV: 62 NL: 3.16E7  
 T: FTMS (1,1) + p ESI Full ms [103.00-2000.00]

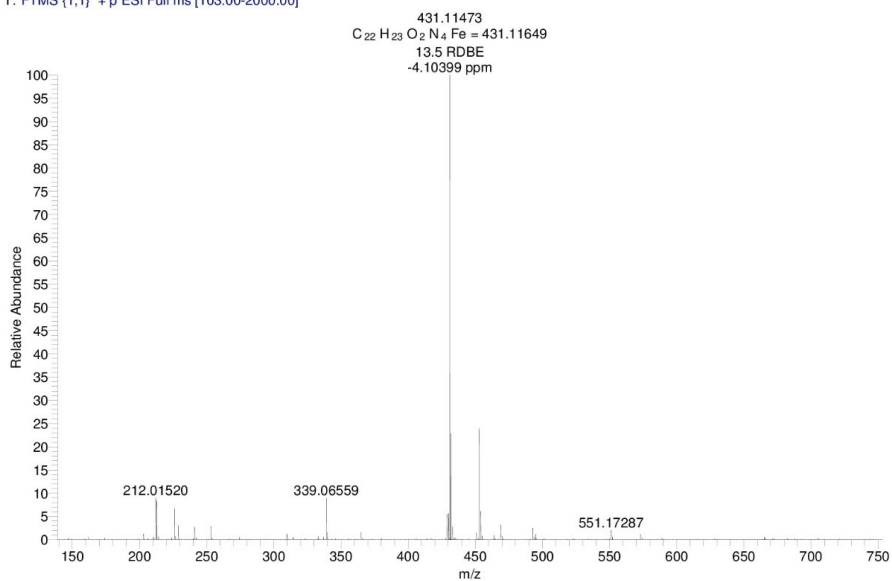

Figure S24: HRMS spectra of 5g

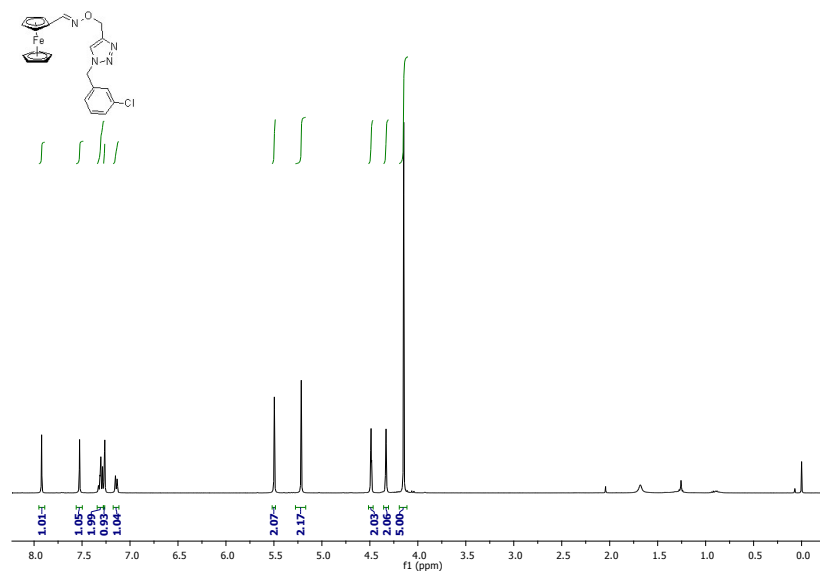Figure S25: <sup>1</sup>H NMR spectra of 5h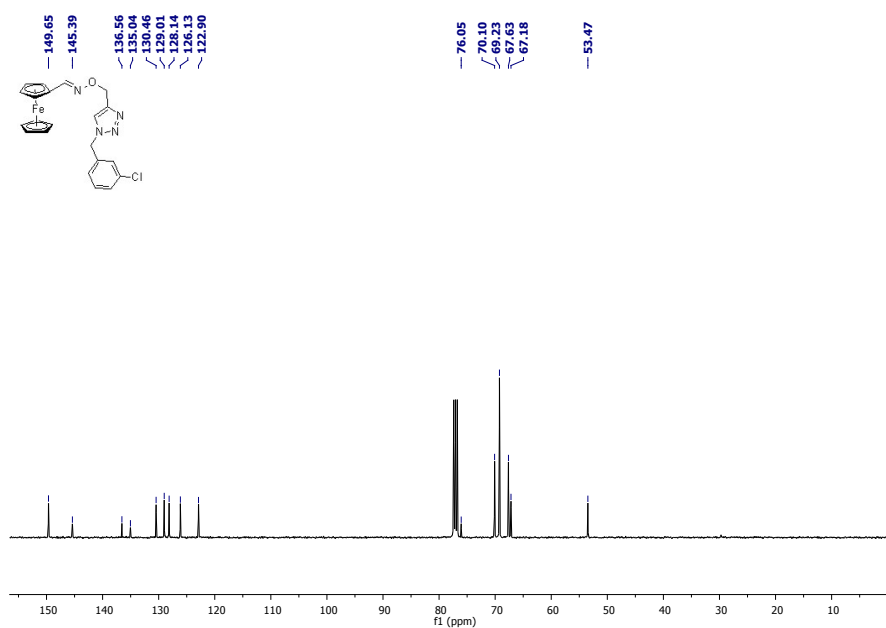Figure S26: <sup>13</sup>C NMR spectra of 5h

D:\Sai krishna Important\...RT-3-CLOX  
RANJITHA  
RAJIV TRIVEDI  
Analysed By G SaiKrishna  
11/7/2017 12:04:11 PM  
Thermo Exactive Orbitrap

CSIR-INDIAN INSTITUTE OF CHEMICAL TECHNOLOGY  
NATIONAL CENTRE FOR MASS SPECTROMETRY

RT-3-CLOX #27-71 RT: 0.11-0.26 AV: 45 NL: 3.20E7  
T: FTMS {1,1} + p ESI Full ms [103.00-2000.00]

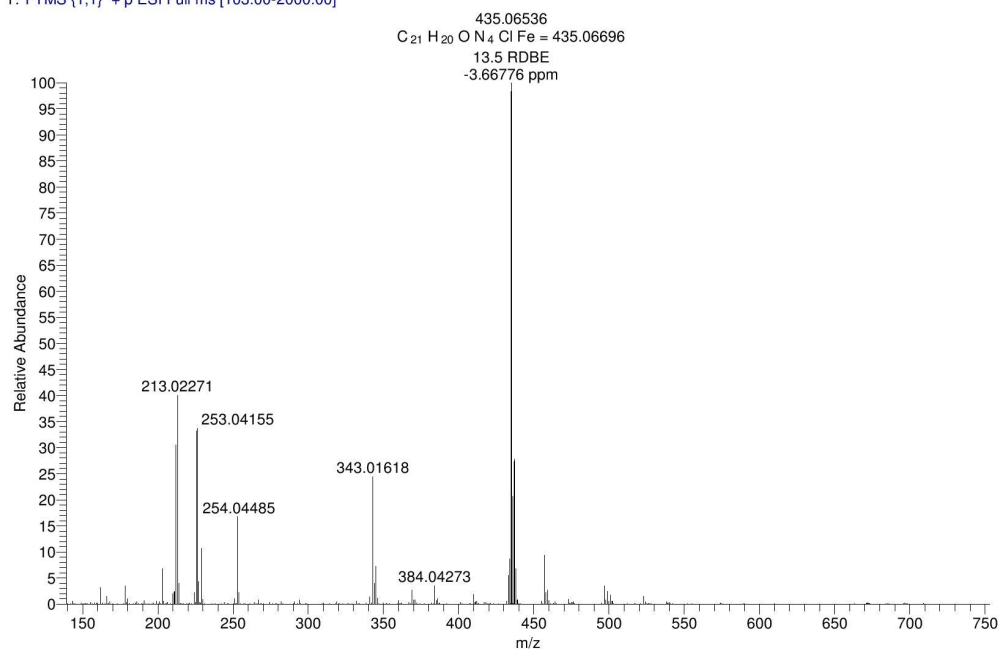

Figure S27: HRMS spectra of 5h



## Stability Studies

(a)

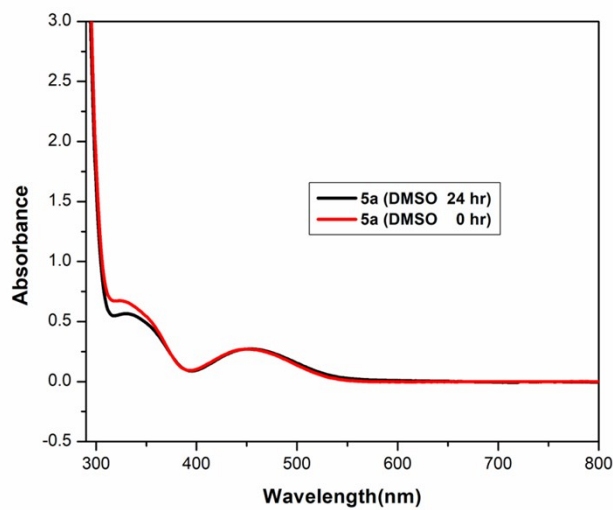

(b)

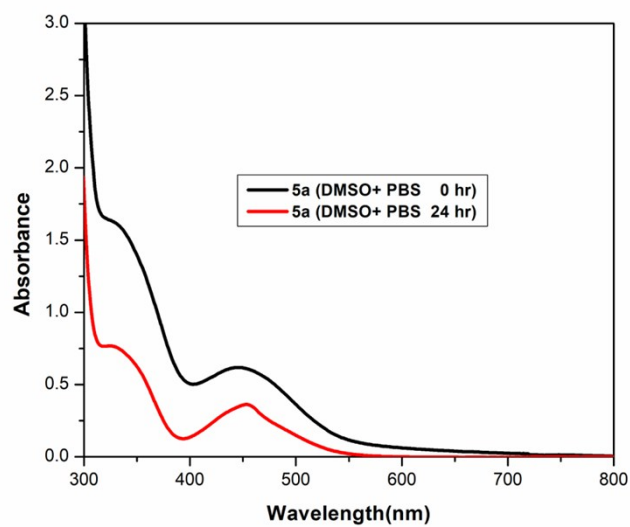

**Figure S28:** UV-visible spectroscopy of compound **5a** in (a) DMSO and (b) 10% DMSO in PBS solution (pH 7.4).

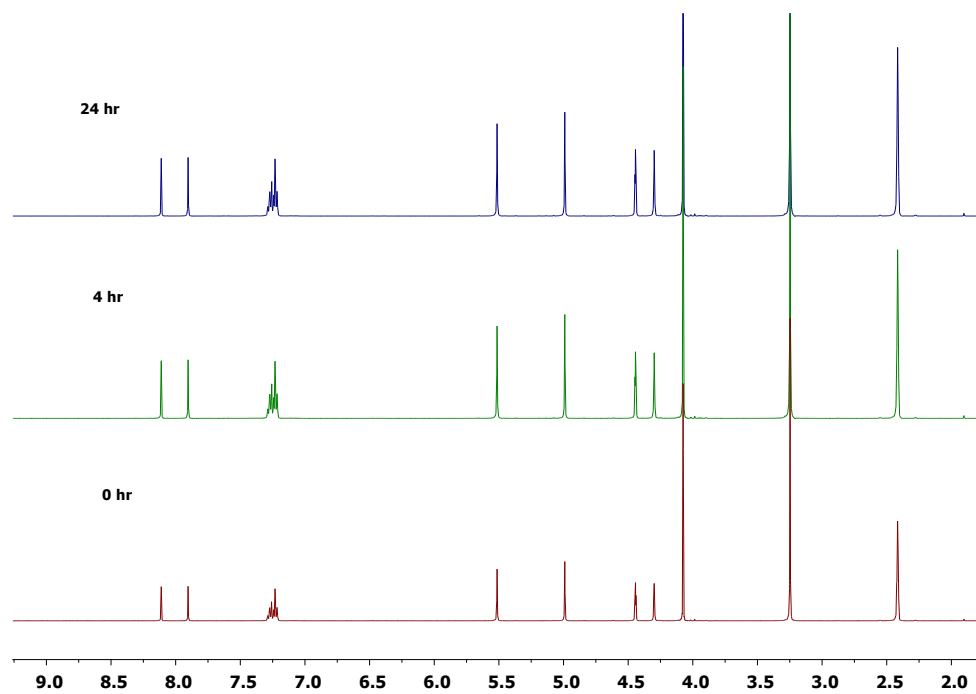

**Figure 29:** Stacked <sup>1</sup>H-NMR spectrum of compound 5a in DMSO-d<sub>6</sub> at different time intervals (0, 4 and 24 hr.).

**Crystallographic data of compound 5a****Table S1.** Atomic coordinates ( $\times 10^4$ ) and equivalent isotropic displacement parameters ( $\text{\AA}^2 \times 10^3$ ) for **5a**. U (eq) is defined as one third of the trace of the orthogonalized  $U^{ij}$  tensor.

|       | x       | y       | z       | U(eq)  |
|-------|---------|---------|---------|--------|
| C(1)  | 5399(1) | 3549(2) | 5987(2) | 47(1)  |
| C(2)  | 4930(1) | 2649(3) | 5382(3) | 70(1)  |
| C(3)  | 4252(2) | 2516(4) | 5779(4) | 96(1)  |
| C(4)  | 4036(2) | 3290(4) | 6784(4) | 105(1) |
| C(5)  | 4495(2) | 4201(4) | 7379(3) | 100(1) |
| C(6)  | 5180(2) | 4337(3) | 6998(2) | 70(1)  |
| C(7)  | 6133(1) | 3763(2) | 5543(2) | 52(1)  |
| C(8)  | 6767(1) | 2131(2) | 4096(2) | 41(1)  |
| C(9)  | 7054(1) | 851(2)  | 4314(2) | 38(1)  |
| C(10) | 7449(1) | -64(2)  | 3449(2) | 51(1)  |
| C(11) | 8428(1) | 2420(2) | 2039(2) | 38(1)  |
| C(12) | 9010(1) | 3392(2) | 2271(2) | 36(1)  |
| C(13) | 9441(1) | 3609(2) | 3448(2) | 42(1)  |
| C(14) | 9934(1) | 4672(2) | 3220(2) | 49(1)  |
| C(15) | 9811(1) | 5122(2) | 1920(2) | 50(1)  |
| C(16) | 9241(1) | 4346(2) | 1333(2) | 43(1)  |
| C(17) | 8312(1) | 5934(2) | 4402(2) | 50(1)  |
| C(18) | 7879(1) | 5733(2) | 3251(2) | 47(1)  |
| C(19) | 8098(1) | 6659(2) | 2310(2) | 46(1)  |
| C(20) | 8668(1) | 7433(2) | 2873(2) | 47(1)  |
| C(21) | 8806(1) | 6989(2) | 4165(2) | 49(1)  |
| Fe(1) | 8917(1) | 5379(1) | 2916(1) | 32(1)  |
| N(1)  | 6485(1) | 2479(2) | 5206(1) | 39(1)  |
| N(2)  | 6589(1) | 1471(2) | 6086(2) | 50(1)  |
| N(3)  | 6936(1) | 475(2)  | 5542(2) | 46(1)  |
| N(4)  | 8292(1) | 1517(2) | 2882(2) | 43(1)  |
| O(1)  | 7710(1) | 679(1)  | 2392(1) | 47(1)  |

**Table S2.** Bond lengths [ $\text{\AA}$ ] and angles [ $^\circ$ ] for compound **5a**.

---

|              |            |
|--------------|------------|
| C(1)-C(2)    | 1.361(3)   |
| C(1)-C(6)    | 1.376(3)   |
| C(1)-C(7)    | 1.502(3)   |
| C(2)-C(3)    | 1.376(4)   |
| C(2)-H(2)    | 0.9300     |
| C(3)-C(4)    | 1.362(5)   |
| C(3)-H(3)    | 0.9300     |
| C(4)-C(5)    | 1.353(5)   |
| C(4)-H(4)    | 0.9300     |
| C(5)-C(6)    | 1.381(4)   |
| C(5)-H(5)    | 0.9300     |
| C(6)-H(6)    | 0.9300     |
| C(7)-N(1)    | 1.461(2)   |
| C(7)-H(7A)   | 0.9700     |
| C(7)-H(7B)   | 0.9700     |
| C(8)-N(1)    | 1.337(2)   |
| C(8)-C(9)    | 1.363(3)   |
| C(8)-H(8)    | 0.9300     |
| C(9)-N(3)    | 1.350(2)   |
| C(9)-C(10)   | 1.492(3)   |
| C(10)-O(1)   | 1.420(2)   |
| C(10)-H(10A) | 0.9700     |
| C(10)-H(10B) | 0.9700     |
| C(11)-N(4)   | 1.270(2)   |
| C(11)-C(12)  | 1.452(2)   |
| C(11)-H(11)  | 0.9300     |
| C(12)-C(16)  | 1.427(3)   |
| C(12)-C(13)  | 1.429(3)   |
| C(12)-Fe(1)  | 2.0445(17) |
| C(13)-C(14)  | 1.416(3)   |
| C(13)-Fe(1)  | 2.0322(18) |
| C(13)-H(13)  | 0.9300     |
| C(14)-C(15)  | 1.413(3)   |
| C(14)-Fe(1)  | 2.0395(18) |

|                |            |
|----------------|------------|
| C(14)-H(14)    | 0.9300     |
| C(15)-C(16)    | 1.412(3)   |
| C(15)-Fe(1)    | 2.0484(19) |
| C(15)-H(15)    | 0.9300     |
| C(16)-Fe(1)    | 2.0422(18) |
| C(16)-H(16)    | 0.9300     |
| C(17)-C(18)    | 1.408(3)   |
| C(17)-C(21)    | 1.414(3)   |
| C(17)-Fe(1)    | 2.0429(19) |
| C(17)-H(17)    | 0.9300     |
| C(18)-C(19)    | 1.402(3)   |
| C(18)-Fe(1)    | 2.0396(18) |
| C(18)-H(18)    | 0.9300     |
| C(19)-C(20)    | 1.401(3)   |
| C(19)-Fe(1)    | 2.0431(18) |
| C(19)-H(19)    | 0.9300     |
| C(20)-C(21)    | 1.407(3)   |
| C(20)-Fe(1)    | 2.0399(19) |
| C(20)-H(20)    | 0.9300     |
| C(21)-Fe(1)    | 2.0399(19) |
| C(21)-H(21)    | 0.9300     |
| N(1)-N(2)      | 1.337(2)   |
| N(2)-N(3)      | 1.311(2)   |
| N(4)-O(1)      | 1.428(2)   |
|                |            |
| C(2)-C(1)-C(6) | 118.8(2)   |
| C(2)-C(1)-C(7) | 122.1(2)   |
| C(6)-C(1)-C(7) | 119.0(2)   |
| C(1)-C(2)-C(3) | 120.7(3)   |
| C(1)-C(2)-H(2) | 119.6      |
| C(3)-C(2)-H(2) | 119.6      |
| C(4)-C(3)-C(2) | 120.5(3)   |
| C(4)-C(3)-H(3) | 119.7      |
| C(2)-C(3)-H(3) | 119.7      |
| C(5)-C(4)-C(3) | 119.1(3)   |
| C(5)-C(4)-H(4) | 120.5      |

|                     |            |
|---------------------|------------|
| C(3)-C(4)-H(4)      | 120.5      |
| C(4)-C(5)-C(6)      | 121.0(3)   |
| C(4)-C(5)-H(5)      | 119.5      |
| C(6)-C(5)-H(5)      | 119.5      |
| C(1)-C(6)-C(5)      | 119.9(3)   |
| C(1)-C(6)-H(6)      | 120.1      |
| C(5)-C(6)-H(6)      | 120.1      |
| N(1)-C(7)-C(1)      | 113.46(17) |
| N(1)-C(7)-H(7A)     | 108.9      |
| C(1)-C(7)-H(7A)     | 108.9      |
| N(1)-C(7)-H(7B)     | 108.9      |
| C(1)-C(7)-H(7B)     | 108.9      |
| H(7A)-C(7)-H(7B)    | 107.7      |
| N(1)-C(8)-C(9)      | 105.25(16) |
| N(1)-C(8)-H(8)      | 127.4      |
| C(9)-C(8)-H(8)      | 127.4      |
| N(3)-C(9)-C(8)      | 108.09(16) |
| N(3)-C(9)-C(10)     | 121.47(17) |
| C(8)-C(9)-C(10)     | 130.43(17) |
| O(1)-C(10)-C(9)     | 111.82(16) |
| O(1)-C(10)-H(10A)   | 109.3      |
| C(9)-C(10)-H(10A)   | 109.3      |
| O(1)-C(10)-H(10B)   | 109.3      |
| C(9)-C(10)-H(10B)   | 109.3      |
| H(10A)-C(10)-H(10B) | 107.9      |
| N(4)-C(11)-C(12)    | 121.20(17) |
| N(4)-C(11)-H(11)    | 119.4      |
| C(12)-C(11)-H(11)   | 119.4      |
| C(16)-C(12)-C(13)   | 107.33(16) |
| C(16)-C(12)-C(11)   | 124.75(17) |
| C(13)-C(12)-C(11)   | 127.90(17) |
| C(16)-C(12)-Fe(1)   | 69.49(10)  |
| C(13)-C(12)-Fe(1)   | 69.02(10)  |
| C(11)-C(12)-Fe(1)   | 125.52(12) |
| C(14)-C(13)-C(12)   | 107.90(18) |
| C(14)-C(13)-Fe(1)   | 69.93(11)  |

|                   |            |
|-------------------|------------|
| C(12)-C(13)-Fe(1) | 69.94(10)  |
| C(14)-C(13)-H(13) | 126.0      |
| C(12)-C(13)-H(13) | 126.0      |
| Fe(1)-C(13)-H(13) | 125.7      |
| C(15)-C(14)-C(13) | 108.31(18) |
| C(15)-C(14)-Fe(1) | 70.12(11)  |
| C(13)-C(14)-Fe(1) | 69.38(10)  |
| C(15)-C(14)-H(14) | 125.8      |
| C(13)-C(14)-H(14) | 125.8      |
| Fe(1)-C(14)-H(14) | 126.2      |
| C(16)-C(15)-C(14) | 108.27(18) |
| C(16)-C(15)-Fe(1) | 69.58(10)  |
| C(14)-C(15)-Fe(1) | 69.44(11)  |
| C(16)-C(15)-H(15) | 125.9      |
| C(14)-C(15)-H(15) | 125.9      |
| Fe(1)-C(15)-H(15) | 126.7      |
| C(15)-C(16)-C(12) | 108.18(18) |
| C(15)-C(16)-Fe(1) | 70.05(11)  |
| C(12)-C(16)-Fe(1) | 69.65(10)  |
| C(15)-C(16)-H(16) | 125.9      |
| C(12)-C(16)-H(16) | 125.9      |
| Fe(1)-C(16)-H(16) | 126.0      |
| C(18)-C(17)-C(21) | 107.79(18) |
| C(18)-C(17)-Fe(1) | 69.71(11)  |
| C(21)-C(17)-Fe(1) | 69.63(11)  |
| C(18)-C(17)-H(17) | 126.1      |
| C(21)-C(17)-H(17) | 126.1      |
| Fe(1)-C(17)-H(17) | 126.1      |
| C(19)-C(18)-C(17) | 108.24(18) |
| C(19)-C(18)-Fe(1) | 70.04(11)  |
| C(17)-C(18)-Fe(1) | 69.96(11)  |
| C(19)-C(18)-H(18) | 125.9      |
| C(17)-C(18)-H(18) | 125.9      |
| Fe(1)-C(18)-H(18) | 125.7      |
| C(20)-C(19)-C(18) | 107.97(18) |
| C(20)-C(19)-Fe(1) | 69.80(11)  |

|                   |            |
|-------------------|------------|
| C(18)-C(19)-Fe(1) | 69.78(11)  |
| C(20)-C(19)-H(19) | 126.0      |
| C(18)-C(19)-H(19) | 126.0      |
| Fe(1)-C(19)-H(19) | 126.0      |
| C(19)-C(20)-C(21) | 108.46(18) |
| C(19)-C(20)-Fe(1) | 70.06(11)  |
| C(21)-C(20)-Fe(1) | 69.82(11)  |
| C(19)-C(20)-H(20) | 125.8      |
| C(21)-C(20)-H(20) | 125.8      |
| Fe(1)-C(20)-H(20) | 125.9      |
| C(20)-C(21)-C(17) | 107.53(18) |
| C(20)-C(21)-Fe(1) | 69.82(11)  |
| C(17)-C(21)-Fe(1) | 69.86(11)  |
| C(20)-C(21)-H(21) | 126.2      |
| C(17)-C(21)-H(21) | 126.2      |
| Fe(1)-C(21)-H(21) | 125.7      |
| C(13)-Fe(1)-C(14) | 40.69(8)   |
| C(13)-Fe(1)-C(20) | 158.80(8)  |
| C(14)-Fe(1)-C(20) | 122.85(8)  |
| C(13)-Fe(1)-C(21) | 122.74(8)  |
| C(14)-Fe(1)-C(21) | 107.13(8)  |
| C(20)-Fe(1)-C(21) | 40.35(8)   |
| C(13)-Fe(1)-C(18) | 123.37(8)  |
| C(14)-Fe(1)-C(18) | 158.95(9)  |
| C(20)-Fe(1)-C(18) | 67.54(8)   |
| C(21)-Fe(1)-C(18) | 67.94(8)   |
| C(13)-Fe(1)-C(16) | 68.75(8)   |
| C(14)-Fe(1)-C(16) | 68.23(8)   |
| C(20)-Fe(1)-C(16) | 122.63(8)  |
| C(21)-Fe(1)-C(16) | 157.91(9)  |
| C(18)-Fe(1)-C(16) | 124.09(8)  |
| C(13)-Fe(1)-C(17) | 107.75(8)  |
| C(14)-Fe(1)-C(17) | 122.68(9)  |
| C(20)-Fe(1)-C(17) | 67.74(8)   |
| C(21)-Fe(1)-C(17) | 40.51(9)   |
| C(18)-Fe(1)-C(17) | 40.34(8)   |



|                   |            |
|-------------------|------------|
| C(16)-Fe(1)-C(17) | 160.16(9)  |
| C(13)-Fe(1)-C(19) | 159.35(8)  |
| C(14)-Fe(1)-C(19) | 158.90(9)  |
| C(20)-Fe(1)-C(19) | 40.14(8)   |
| C(21)-Fe(1)-C(19) | 67.84(8)   |
| C(18)-Fe(1)-C(19) | 40.18(8)   |
| C(16)-Fe(1)-C(19) | 108.26(8)  |
| C(17)-Fe(1)-C(19) | 67.73(8)   |
| C(13)-Fe(1)-C(12) | 41.04(7)   |
| C(14)-Fe(1)-C(12) | 68.55(8)   |
| C(20)-Fe(1)-C(12) | 158.76(8)  |
| C(21)-Fe(1)-C(12) | 159.57(8)  |
| C(18)-Fe(1)-C(12) | 108.50(8)  |
| C(16)-Fe(1)-C(12) | 40.86(7)   |
| C(17)-Fe(1)-C(12) | 123.74(8)  |
| C(19)-Fe(1)-C(12) | 123.34(8)  |
| C(13)-Fe(1)-C(15) | 68.38(8)   |
| C(14)-Fe(1)-C(15) | 40.45(9)   |
| C(20)-Fe(1)-C(15) | 107.67(8)  |
| C(21)-Fe(1)-C(15) | 122.17(9)  |
| C(18)-Fe(1)-C(15) | 159.63(9)  |
| C(16)-Fe(1)-C(15) | 40.38(8)   |
| C(17)-Fe(1)-C(15) | 158.22(9)  |
| C(19)-Fe(1)-C(15) | 123.45(9)  |
| C(12)-Fe(1)-C(15) | 68.34(8)   |
| N(2)-N(1)-C(8)    | 110.45(16) |
| N(2)-N(1)-C(7)    | 120.41(16) |
| C(8)-N(1)-C(7)    | 129.08(16) |
| N(3)-N(2)-N(1)    | 107.40(15) |
| N(2)-N(3)-C(9)    | 108.82(15) |
| C(11)-N(4)-O(1)   | 109.52(15) |
| C(10)-O(1)-N(4)   | 108.29(15) |

---

Symmetry transformations used to generate equivalent atoms:

**Table S3.** Anisotropic displacement parameters ( $\text{\AA}^2 \times 10^3$ ) for compound **5a**. The anisotropic displacement factor exponent takes the form:  $-2 \square^2 [ h^2 a^* 2 U^{11} + \dots + 2 h k a^* b^* U^{12} ]$

|       | U11    | U22    | U33    | U23    | U13   | U12    |
|-------|--------|--------|--------|--------|-------|--------|
| C(1)  | 53(1)  | 45(1)  | 42(1)  | 4(1)   | 8(1)  | 12(1)  |
| C(2)  | 61(2)  | 66(2)  | 86(2)  | -11(1) | 13(1) | -5(1)  |
| C(3)  | 59(2)  | 83(2)  | 145(3) | 24(2)  | 10(2) | -4(2)  |
| C(4)  | 63(2)  | 110(3) | 148(3) | 67(3)  | 44(2) | 41(2)  |
| C(5)  | 106(3) | 115(3) | 85(2)  | 25(2)  | 49(2) | 68(2)  |
| C(6)  | 81(2)  | 74(2)  | 55(1)  | -5(1)  | 9(1)  | 35(1)  |
| C(7)  | 61(1)  | 37(1)  | 58(1)  | -6(1)  | 11(1) | 2(1)   |
| C(8)  | 52(1)  | 39(1)  | 33(1)  | 5(1)   | 10(1) | -1(1)  |
| C(9)  | 37(1)  | 36(1)  | 40(1)  | 1(1)   | 8(1)  | -5(1)  |
| C(10) | 55(1)  | 36(1)  | 63(1)  | -3(1)  | 22(1) | -2(1)  |
| C(11) | 39(1)  | 35(1)  | 41(1)  | -9(1)  | 8(1)  | 5(1)   |
| C(12) | 36(1)  | 33(1)  | 41(1)  | -5(1)  | 10(1) | 6(1)   |
| C(13) | 39(1)  | 38(1)  | 50(1)  | 0(1)   | 4(1)  | 10(1)  |
| C(14) | 32(1)  | 48(1)  | 66(1)  | -10(1) | 4(1)  | 4(1)   |
| C(15) | 42(1)  | 44(1)  | 66(1)  | -5(1)  | 26(1) | -2(1)  |
| C(16) | 46(1)  | 43(1)  | 42(1)  | -3(1)  | 17(1) | 4(1)   |
| C(17) | 61(1)  | 48(1)  | 43(1)  | 2(1)   | 20(1) | 14(1)  |
| C(18) | 35(1)  | 42(1)  | 65(1)  | -9(1)  | 13(1) | 3(1)   |
| C(19) | 47(1)  | 45(1)  | 45(1)  | -3(1)  | 0(1)  | 15(1)  |
| C(20) | 51(1)  | 31(1)  | 61(1)  | 0(1)   | 14(1) | 4(1)   |
| C(21) | 50(1)  | 46(1)  | 50(1)  | -19(1) | -1(1) | 8(1)   |
| Fe(1) | 31(1)  | 30(1)  | 36(1)  | -3(1)  | 7(1)  | 3(1)   |
| N(1)  | 44(1)  | 37(1)  | 37(1)  | 5(1)   | 9(1)  | 1(1)   |
| N(2)  | 64(1)  | 48(1)  | 39(1)  | 9(1)   | 11(1) | 4(1)   |
| N(3)  | 55(1)  | 41(1)  | 43(1)  | 7(1)   | 6(1)  | 6(1)   |
| N(4)  | 38(1)  | 41(1)  | 50(1)  | -6(1)  | 9(1)  | -2(1)  |
| O(1)  | 49(1)  | 44(1)  | 50(1)  | -10(1) | 17(1) | -10(1) |

**Table S4.** Hydrogen coordinates ( $\times 10^4$ ) and isotropic displacement parameters ( $\text{\AA}^2 \times 10^3$ ) for compound **5a**.

---

|        | x     | y    | z    | U(eq) |
|--------|-------|------|------|-------|
| H(2)   | 5070  | 2117 | 4692 | 84    |
| H(3)   | 3938  | 1894 | 5358 | 115   |
| H(4)   | 3578  | 3192 | 7058 | 127   |
| H(5)   | 4348  | 4745 | 8054 | 120   |
| H(6)   | 5492  | 4959 | 7423 | 84    |
| H(7A)  | 6103  | 4367 | 4789 | 62    |
| H(7B)  | 6421  | 4226 | 6228 | 62    |
| H(8)   | 6767  | 2652 | 3337 | 49    |
| H(10A) | 7845  | -490 | 3951 | 61    |
| H(10B) | 7136  | -797 | 3113 | 61    |
| H(11)  | 8150  | 2459 | 1260 | 46    |
| H(13)  | 9404  | 3136 | 4227 | 50    |
| H(14)  | 10279 | 5015 | 3823 | 58    |
| H(15)  | 10062 | 5810 | 1520 | 60    |
| H(16)  | 9050  | 4442 | 482  | 52    |
| H(17)  | 8280  | 5458 | 5180 | 60    |
| H(18)  | 7511  | 5095 | 3134 | 56    |
| H(19)  | 7900  | 6745 | 1463 | 55    |
| H(20)  | 8913  | 8122 | 2461 | 56    |
| H(21)  | 9159  | 7328 | 4757 | 59    |

---

**Table S5.** Torsion angles [°] for compound **5a**.

---

|                         |             |
|-------------------------|-------------|
| C(6)-C(1)-C(2)-C(3)     | -0.7(4)     |
| C(7)-C(1)-C(2)-C(3)     | -177.3(2)   |
| C(1)-C(2)-C(3)-C(4)     | 0.3(5)      |
| C(2)-C(3)-C(4)-C(5)     | 0.7(5)      |
| C(3)-C(4)-C(5)-C(6)     | -1.3(5)     |
| C(2)-C(1)-C(6)-C(5)     | 0.1(4)      |
| C(7)-C(1)-C(6)-C(5)     | 176.9(2)    |
| C(4)-C(5)-C(6)-C(1)     | 0.9(4)      |
| C(2)-C(1)-C(7)-N(1)     | -42.5(3)    |
| C(6)-C(1)-C(7)-N(1)     | 140.8(2)    |
| N(1)-C(8)-C(9)-N(3)     | 0.0(2)      |
| N(1)-C(8)-C(9)-C(10)    | -179.04(19) |
| N(3)-C(9)-C(10)-O(1)    | -161.09(17) |
| C(8)-C(9)-C(10)-O(1)    | 17.8(3)     |
| N(4)-C(11)-C(12)-C(16)  | 173.69(17)  |
| N(4)-C(11)-C(12)-C(13)  | -8.1(3)     |
| N(4)-C(11)-C(12)-Fe(1)  | -98.0(2)    |
| C(16)-C(12)-C(13)-C(14) | -0.73(19)   |
| C(11)-C(12)-C(13)-C(14) | -179.22(17) |
| Fe(1)-C(12)-C(13)-C(14) | -59.88(13)  |
| C(16)-C(12)-C(13)-Fe(1) | 59.15(12)   |
| C(11)-C(12)-C(13)-Fe(1) | -119.34(17) |
| C(12)-C(13)-C(14)-C(15) | 0.4(2)      |
| Fe(1)-C(13)-C(14)-C(15) | -59.52(13)  |
| C(12)-C(13)-C(14)-Fe(1) | 59.88(12)   |
| C(13)-C(14)-C(15)-C(16) | 0.1(2)      |
| Fe(1)-C(14)-C(15)-C(16) | -58.91(13)  |
| C(13)-C(14)-C(15)-Fe(1) | 59.06(13)   |
| C(14)-C(15)-C(16)-C(12) | -0.6(2)     |
| Fe(1)-C(15)-C(16)-C(12) | -59.43(12)  |
| C(14)-C(15)-C(16)-Fe(1) | 58.83(13)   |
| C(13)-C(12)-C(16)-C(15) | 0.8(2)      |
| C(11)-C(12)-C(16)-C(15) | 179.37(16)  |
| Fe(1)-C(12)-C(16)-C(15) | 59.68(13)   |

|                         |             |
|-------------------------|-------------|
| C(13)-C(12)-C(16)-Fe(1) | -58.85(12)  |
| C(11)-C(12)-C(16)-Fe(1) | 119.69(16)  |
| C(21)-C(17)-C(18)-C(19) | -0.4(2)     |
| Fe(1)-C(17)-C(18)-C(19) | -59.82(13)  |
| C(21)-C(17)-C(18)-Fe(1) | 59.44(13)   |
| C(17)-C(18)-C(19)-C(20) | 0.2(2)      |
| Fe(1)-C(18)-C(19)-C(20) | -59.58(13)  |
| C(17)-C(18)-C(19)-Fe(1) | 59.76(13)   |
| C(18)-C(19)-C(20)-C(21) | 0.1(2)      |
| Fe(1)-C(19)-C(20)-C(21) | -59.47(14)  |
| C(18)-C(19)-C(20)-Fe(1) | 59.56(13)   |
| C(19)-C(20)-C(21)-C(17) | -0.3(2)     |
| Fe(1)-C(20)-C(21)-C(17) | -59.94(13)  |
| C(19)-C(20)-C(21)-Fe(1) | 59.62(13)   |
| C(18)-C(17)-C(21)-C(20) | 0.4(2)      |
| Fe(1)-C(17)-C(21)-C(20) | 59.92(13)   |
| C(18)-C(17)-C(21)-Fe(1) | -59.49(13)  |
| C(9)-C(8)-N(1)-N(2)     | 0.1(2)      |
| C(9)-C(8)-N(1)-C(7)     | 177.35(18)  |
| C(1)-C(7)-N(1)-N(2)     | -58.5(2)    |
| C(1)-C(7)-N(1)-C(8)     | 124.6(2)    |
| C(8)-N(1)-N(2)-N(3)     | -0.2(2)     |
| C(7)-N(1)-N(2)-N(3)     | -177.68(17) |
| N(1)-N(2)-N(3)-C(9)     | 0.2(2)      |
| C(8)-C(9)-N(3)-N(2)     | -0.1(2)     |
| C(10)-C(9)-N(3)-N(2)    | 179.04(17)  |
| C(12)-C(11)-N(4)-O(1)   | -178.41(14) |
| C(9)-C(10)-O(1)-N(4)    | 72.8(2)     |
| C(11)-N(4)-O(1)-C(10)   | -164.92(15) |

---

Symmetry transformations used to generate equivalent atoms:
